STUDY PROTOCOL

# The every woman study™ low- and middle-income countries edition protocol: A multi-country observational study to assess opportunities and challenges to improving survival and quality of life for women with ovarian cancer

Frances Reid <sup>1\*</sup>, Tracey Adams<sup>2,3</sup>, Rafe Sadnan Adel<sup>1,4</sup>, Carlos E. Andrade<sup>5</sup>, Anmol Bajwa<sup>1</sup>, Ian G. Bambury<sup>6</sup>, Nada Benhima <sup>7</sup>, Raikhan Bolatbekova <sup>8</sup>, David Cantu-De Leon<sup>9</sup>, Phaedra Charlton<sup>1</sup>, Carlos Chávez Chirinos<sup>10</sup>, Robin Cohen<sup>1,11</sup>, Mary Eiken<sup>12</sup>, Erick Estuardo Estrada<sup>13</sup>, Dilyara Kaidarova<sup>8</sup>, Iren Lau<sup>14</sup>, Clara MacKay<sup>1</sup>, Precious Takondwa Makondi<sup>15</sup>, Asima Mukhopadhyay<sup>16</sup>, Aisha Mustapha<sup>17</sup>, Florencia Noll<sup>18</sup>, Martin Origa<sup>19</sup>, Jitendra Pariyar<sup>20</sup>, Shahana Pervin<sup>21</sup>, Ngoc T. H. Phan<sup>22</sup>, Basel Refky<sup>23</sup>, Afrin F. Shaffi <sup>24</sup>, Eva-Maria Strömsholm<sup>25</sup>, Yin Ling Woo<sup>26</sup>, Sook-Yee Yoon<sup>26</sup>, Nargiza Zakirova<sup>27</sup>, Runcie C. W. Chidebe<sup>1,28,29</sup> , Garth Funston<sup>30</sup> , Isabelle Soerjomataram<sup>31</sup> 

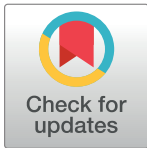

 OPEN ACCESS

**Citation:** Reid F, Adams T, Adel RS, Andrade CE, Bajwa A, Bambury IG, et al. (2024) The every woman study™ low- and middle-income countries edition protocol: A multi-country observational study to assess opportunities and challenges to improving survival and quality of life for women with ovarian cancer. PLoS ONE 19(5): e0298154. <https://doi.org/10.1371/journal.pone.0298154>

**Editor:** Nontuthuzelo Iris Muriel Somdyala, South African Medical Research Council, SOUTH AFRICA

**Received:** November 29, 2023

**Accepted:** January 16, 2024

**Published:** May 29, 2024

**Peer Review History:** PLOS recognizes the benefits of transparency in the peer review process; therefore, we enable the publication of all of the content of peer review and author responses alongside final, published articles. The editorial history of this article is available here: <https://doi.org/10.1371/journal.pone.0298154>

**Copyright:** © 2024 Reid et al. This is an open access article distributed under the terms of the [Creative Commons Attribution License](https://creativecommons.org/licenses/by/4.0/), which permits unrestricted use, distribution, and reproduction in any medium, provided the original author and source are credited.

**1** World Ovarian Cancer Coalition, Toronto, Ontario, Canada, **2** Department of Obstetrics and Gynaecology, Grootte Schuur Hospital, Cape Town, South Africa, **3** South African Medical Research Centre Gynaecological Cancer Research Centre (SA MRC UCT GCRC), Cape Town, South Africa, **4** CancerBD, Dhaka, Bangladesh, **5** Department of Gynecologic Oncology, Barretos Cancer Hospital, Barretos, Brazil, **6** University of the West Indies, Kingston, Jamaica, **7** Department of Medical Oncology, Mohammed VI University Hospital, Marrakech, Morocco, **8** Kazakh Institute of Oncology and Radiology, Almaty, Kazakhstan, **9** Instituto Nacional de Cancerología, Ciudad de México, México, **10** Instituto Regional de Enfermedades Neoplásicas, Arequipa, Perú, **11** Sandy Rollman Ovarian Cancer Foundation, Wynnewood, Pennsylvania, United States of America, **12** International Gynecologic Cancer Society, Chicago, Illinois, United States of America, **13** Hospital General San Juan de Dios, Guatemala City, Guatemala, **14** Ovarian Cancer Malaysia, Kuala Lumpur, Malaysia, **15** National Cancer Center, Kamuzu Central Hospital, Kamuzu, Malawi, **16** Kolkata Gynaecological Oncology Trials and Translational Research Group, Kolkata, India, **17** Ahmadu Bello University Teaching Hospital, Zaria, Kaduna State, Nigeria, **18** Sanatorio Allende, Cordoba, Argentina, **19** Uganda Cancer Institute, Kampala, Uganda, **20** Civil Service Hospital of Nepal, Kathmandu, Nepal, **21** National Institute of Cancer Research & Hospital, Dhaka, Bangladesh, **22** Danang Oncology Hospital, Danang, Vietnam, **23** Mansoura University Oncology Center, Mansoura, Egypt, **24** Moi University/Moi Teaching and Referral Hospital, Eldoret, Kenya, **25** Gynecological Cancer Patients in Finland, Helsinki, Finland, **26** Department of Obstetrics and Gynaecology, University Malaya Medical Centre, Kuala Lumpur, Malaysia, **27** Republican Specialized Scientific and Practical Medical Center of Oncology and Radiology of the Ministry of Health of the Republic of Uzbekistan, Tashkent, Uzbekistan, **28** Project PINK BLUE, Abuja, Nigeria, **29** Department of Sociology & Gerontology, Miami University, Oxford, Ohio, United States of America, **30** Wolfson Institute of Population Health, Queen Mary University of London, London, United Kingdom, **31** Cancer Surveillance Branch, International Agency for Research on Cancer, Lyon, France

 These authors contributed equally to this work.

\* [frances@worldovariancancercoalition.org](mailto:frances@worldovariancancercoalition.org)

## Abstract

### Background

Ovarian cancer is a challenging disease to diagnose and treat effectively with five-year survival rates below 50%. Previous patient experience research in high-income countries

**Data Availability Statement:** Deidentified research data will be made publicly available when the study is completed and published.

**Funding:** The authors received no specific funding for this work.

**Competing interests:** The authors have declared that no competing interests exist.

highlighted common challenges and opportunities to improve survival and quality of life for women affected by ovarian cancer. However, no comparable data exist for low- and middle-income countries, where 70% of women with the disease live. This study aims to address this evidence gap.

## Methods

This is an observational multi-country study set in low- and middle-income countries. We aim to recruit over 2000 women diagnosed with ovarian cancer across multiple hospitals in 24 countries in Asia, Africa and South America. Country sample sizes have been calculated ( $n = 70\text{--}96$  participants /country), taking account of varying national five-year disease prevalence rates. Women within five years of their diagnosis, who are in contact with participating hospitals, are invited to take part in the study. A questionnaire has been adapted from a tool previously used in high-income countries. It comprises 57 multiple choice and two open-ended questions designed to collect information on demographics, women's knowledge of ovarian cancer, route to diagnosis, access to treatments, surgery and genetic testing, support needs, the impact of the disease on women and their families, and their priorities for action. The questionnaire has been designed in English, translated into local languages and tested according to local ethics requirements. Questionnaires will be administered by a trained member of the clinical team.

## Conclusion

This study will inform further research, advocacy, and action in low- and middle-income countries based on tailored approaches to the national, regional and global challenges and opportunities. In addition, participating countries can choose to repeat the study to track progress and the protocol can be adapted for other countries and other diseases.

## Introduction

### Global incidence and mortality

Ovarian cancer is the eighth most common cancer and eighth most common cause of cancer death in women worldwide [1]. GLOBOCAN estimates that in 2020 there were approximately 314,000 cases diagnosed, 207,000 deaths, and more than 823,000 women living within five years of their diagnosis. Women in low- and middle-income countries (LMICs) account for 70% of ovarian cancer cases [2]. A 42% increase in ovarian cancer incidence, and a 52% increase in mortality, has been predicted by 2040, with the greatest increase expected in LMICs driven by projected population increases [3, 4]. For example, Zambia is predicted to have an increase of 122% in ovarian cancer incidence and 132% in mortality. Further increases are expected linked to the changing prevalence of cancer risk factors, such as lack of physical activity, changing diets, additional body weight, and increasing urbanisation [5–8].

### Challenges associated with ovarian cancer

Five-year survival for ovarian cancer is below 50% even in high-income countries (HICs), and there has been little progress in improving survival in recent years [9]. Nearly two-thirds of women are diagnosed with advanced disease (FIGO stage III or IV) [10]. A major screening trial using ultrasound and serial measurements of Ca 125 did not demonstrate a mortality

benefit and most women are diagnosed after they develop symptoms [11]. Ovarian cancer is a difficult disease to diagnose, and patient and doctor delays are common, in part due to the non-specific nature of the symptoms [12].

At present there is little data from LMICs on the burden of ovarian cancer, including information on types of cancer and stage at diagnosis, pathways to diagnoses, clinical outcomes and the perceptions and experiences of women and their families. Even basic information in incidence is lacking. The proportion of the world's total population covered by cancer registries included in *Cancer Incidence in 5 continents volume XI* is just 15%, varying by continent with just 1% of Africa, 7% of Asia and 8% of South America [13]. In addition, many LMICs have prioritised certain cancers in women such as breast and cervical cancer where screening could have a major impact on mortality [14, 15]. The lack of a clear understanding of the burden of ovarian cancer in LMICs and the subsequent lack of focus could hamper the development of approaches aimed at improving ovarian cancer outcomes.

### Known opportunities for progress

Despite these challenges, there are opportunities for short term progress to improve survival, morbidity, and quality of life. Symptom patterns and the nuances of current diagnostic tests are now better understood [16–18], which could contribute to more timely diagnosis. Improved organisation of diagnostic and treatment services and adherence to guidelines show the potential to reduce delays in diagnosis and improve access to treatment, with a likely positive impact on mortality [19–22].

New targeted treatments specifically PARP-inhibitors are emerging for sub-groups of patients. In high-income countries, genetic testing is increasing access to these treatments and improving identification of those most at risk of developing the disease due to their family history [23]. It has been shown that 18% of women with high-grade serous ovarian cancer, the most common and lethal form of the disease, have inherited mutations in BRCA1 or BRCA2 genes [10]. Identifying family members who are at risk, and taking action (e.g. preventative surgery), has the potential to prevent many cases and this approach has already been deemed cost effective in both high- and upper-middle income countries [24]. However, accessibility and affordability of genetic testing and associated targeted treatments for women with ovarian cancer is still very limited in LMICs, thus currently impacting negatively on their outcomes. However this is an opportunity for progress in these settings.

The World Ovarian Cancer Coalition (Coalition) is a partnership organisation of over 200 patient advocacy and support groups from 50 countries with a mission to improve survival and quality of life for women, no matter where they live. In 2018 it undertook The Every Woman Study™, the largest patient experience study to date of women with ovarian cancer. The study included 1531 women from 44 countries, who took part in an in-depth online survey. While the published results showed a common set of challenges, it revealed wide variation between countries on key metrics, highlighting opportunities for improvement [12]. Domains within the study included the route to diagnosis; time to diagnosis; women's knowledge of the disease pre-diagnosis; family history and genetic testing; access to treatments, surgery and clinical trials; support needs; women's quality of life; and their priorities for action. However, a key limitation of the study was that 95% of responses came from high-income countries (HICs).

### Aim

In this study, we aim to establish a large patient experience evidence base, and characterise the key challenges and opportunities to improve survival and quality of life for women in LMICs.

We will test our hypothesis that key factors vary by country, requiring bespoke potential health strategies. With the evidence obtained from this study we expect to raise the profile of ovarian cancer in LMICs. We hope to enable national teams to engage governments and health policy makers; secure extra funding for diagnostics, research and awareness campaigns; and improve support for women. Examples of this type of approach have been successfully undertaken in high-income countries [25–28].

## Methods

### Design and setting

The study has been developed by the Coalition, in partnership with the International Gynecologic Cancer Society (IGCS). It is overseen by a global oversight committee (OC) comprising clinical and patient advocates from six geographic areas, together with additional data and diagnostic expertise.

This study adopts a low risk, observational, cross-sectional design. A standardised questionnaire, derived from a previously published set of questions used in an online survey with participants recruited via social media in 2018 [12], has been developed to explore the experiences of women with ovarian cancer in LMICs based on symptoms, route to diagnosis, treatment, and quality of life. This study is designed as a one-off interaction with no follow-up, with recruitment of women via participating hospital clinics to maximise uptake.

### Survey development and modification

The 2018 survey questions were originally developed by analysing structured interviews with eight women who had ovarian cancer. The draft survey underwent repeated testing by 23 women with ovarian cancer from 13 countries, including four middle-income countries [12]. In 2021, a panel of 13 clinicians from eight LMICs were questioned regarding the content validity, cultural sensitivity and importance of the topics and questions used in the 2018 study. Subsequent expert input from the OC, which includes six patient representatives, was obtained. This process reduced the original survey from 148 questions to 59; those considered most relevant and important for the LMIC setting. Almost all questions were multiple-choice, but two questions allowed for free-text input. This reduction in length makes data collection within hospital clinics feasible either on paper, online, or by interview, increasing accessibility for those with limited literacy skills or digital access. Face validity of the survey in English was then tested by eight women with ovarian cancer in hospitals in South Africa, Kazakhstan, Vietnam, and Argentina. All found it an acceptable length, appropriate to their setting and experiences, and not missing any key information. [Table 1](#) shows the question domains, and some sample questions. The OC approved the review process and the final version of the survey ([S1 File](#)).

### Study infrastructure

To reach sufficient participants and maximise their ability to participate, the OC proposed collaborating with a selection of clinicians treating women with ovarian cancer either known to the Coalition, or through the extensive network of IGCS members. An initial target list of 31 LMICs was drawn up and approaches made to clinicians and national and regional gynecologic oncology societies. In total, 113 clinical sites have been recruited using snowballing methods across 24 countries ([Fig 1](#)). Classification of country income level was determined using the World Bank open data, accessed in June 2021 [29].

Within each country, a lead clinician (CLC) was assigned to coordinate the national activity and secure approvals by local or national ethics committees as required. As an example, the

**Table 1. Every woman study™ question domains and examples.**

| Domain                                       | Example questions                                                                                                                                                                                                                                                                                                                                                                                                                                                                                                                                                                                                                                                                                                                                                           |
|----------------------------------------------|-----------------------------------------------------------------------------------------------------------------------------------------------------------------------------------------------------------------------------------------------------------------------------------------------------------------------------------------------------------------------------------------------------------------------------------------------------------------------------------------------------------------------------------------------------------------------------------------------------------------------------------------------------------------------------------------------------------------------------------------------------------------------------|
| About You<br>10 questions                    | Q.6 Just before you were diagnosed, in your view what was your household income?<br><ul style="list-style-type: none"> <li>• Below average for your country</li> <li>• Average for your country</li> <li>• Above average for your country</li> <li>• Prefer not to say</li> </ul>                                                                                                                                                                                                                                                                                                                                                                                                                                                                                           |
| Family History<br>3 questions                | Q.11 Have any of the following family relatives (i.e., blood relatives on either your mother or your father's side of the family) had ovarian cancer?<br><b>TICK ALL THAT APPLY</b> <ul style="list-style-type: none"> <li>• Mother</li> <li>• Daughter</li> <li>• Sister</li> <li>• Aunt</li> <li>• Cousin</li> <li>• Grandmother (mother's side)</li> <li>• Grandmother (father's side)</li> <li>• Other more distant relatives (mother's side)</li> <li>• Other more distant relatives (father's side)</li> <li>• No, none of my close family have been affected</li> </ul>                                                                                                                                                                                              |
| Route to diagnosis<br>14 questions           | Q.21 For women who said they experienced symptoms<br>Which type of person, other than a family member, did you <b>first</b> seek advice from, about your symptoms?<br><b>SELECT ONLY ONE ANSWER</b> <ul style="list-style-type: none"> <li>• A local healer</li> <li>• An alternative health practitioner</li> <li>• A family doctor</li> <li>• A gynaecologist</li> <li>• A gynaecologic oncologist (a doctor specialising in the treatment of ovarian cancer)</li> <li>• A gastroenterologist</li> <li>• An emergency room or accident and emergency doctor</li> <li>• A nurse</li> <li>• A pharmacist</li> <li>• Someone else</li> </ul>                                                                                                                                 |
| Treatments for ovarian cancer<br>9 questions | Q.29 In deciding what, if any, treatments you will have to control your ovarian cancer or deal with side effects from treatment, which of the following will affect your decision?<br><b>TICK ALL THAT APPLY</b> <ul style="list-style-type: none"> <li>• The opinion of the doctor</li> <li>• The opinion of my family</li> <li>• I will make up my own mind</li> <li>• The cost of treatment drugs</li> <li>• Other costs associated with treatment such as transport or accommodation</li> <li>• The chance to cure or extend my life</li> <li>• The side effects of treatment</li> <li>• None of the above</li> </ul>                                                                                                                                                   |
| Emotional support needs<br>7 questions       | Q.38 For women who have experienced support needs<br>Are there particular issues you have faced?<br><b>TICK ALL THAT APPLY</b> <ul style="list-style-type: none"> <li>• Fear of the cancer returning</li> <li>• Fear that treatment will not work</li> <li>• Fear of dying</li> <li>• Difficulty with getting back to 'normal life' after treatment</li> <li>• Partner or spouse leaving</li> <li>• Other issues relating to family and friends</li> <li>• Feelings of isolation</li> <li>• Feeling unable to talk to others</li> <li>• Loss of fertility</li> <li>• Regaining sexual intimacy with a partner</li> <li>• Coping with the menopause</li> <li>• Dealing with stigma because of the cancer diagnosis</li> <li>• Other</li> <li>• None in particular</li> </ul> |

*(Continued)*

Table 1. (Continued)

| Domain                                                                           | Example questions                                                                                                                                                                                                                                                                                                                                                                                                                                                                                                                                                                                                                                                                                                                                         |
|----------------------------------------------------------------------------------|-----------------------------------------------------------------------------------------------------------------------------------------------------------------------------------------------------------------------------------------------------------------------------------------------------------------------------------------------------------------------------------------------------------------------------------------------------------------------------------------------------------------------------------------------------------------------------------------------------------------------------------------------------------------------------------------------------------------------------------------------------------|
| Practical support needs<br>5 questions                                           | Q.47 Has having a diagnosis of ovarian cancer had an impact on your financial situation?<br><b>SELECT ONLY ONE ANSWER</b> <ul style="list-style-type: none"> <li>• Yes to a great extent</li> <li>• Yes to some extent</li> <li>• Not much</li> <li>• Not at all</li> <li>• I would prefer not to say</li> </ul>                                                                                                                                                                                                                                                                                                                                                                                                                                          |
| Information needs<br>5 questions                                                 | Q53 If this hospital were able to provide women with information about living with ovarian cancer, what do you think it should include?<br><b>TICK ALL THAT APPLY</b> <ul style="list-style-type: none"> <li>• Information about treatments and diagnosis</li> <li>• Information about living with ovarian cancer and what to expect</li> <li>• Information on how to manage physical and mental health</li> <li>• Managing ovarian cancer that can no longer be treated</li> <li>• Sources of local or national support</li> <li>• A way to meet other women with ovarian cancer in person or online</li> <li>• The hospital already supplies the information I need</li> <li>• Other</li> <li>• I would not like them to provide information</li> </ul> |
| Final Questions<br>6 questions including COVID-19, trials, priorities for action | Q.59 Is there something that is particularly important to you about your experience of ovarian cancer that you would like to share with the study team?                                                                                                                                                                                                                                                                                                                                                                                                                                                                                                                                                                                                   |

<https://doi.org/10.1371/journal.pone.0298154.t001>

protocol submitted in Kenya, is included as a [S2 File](#). CLCs advised on the languages needed and provided contacts for translators who could meet the requirements of the various ethics committees. The survey has been translated into 28 languages using the agencies recommended by the CLCs, and translations checked by back translation where required by national ethics, the clinical team, the study team, and by one or two local patients. The CLC is

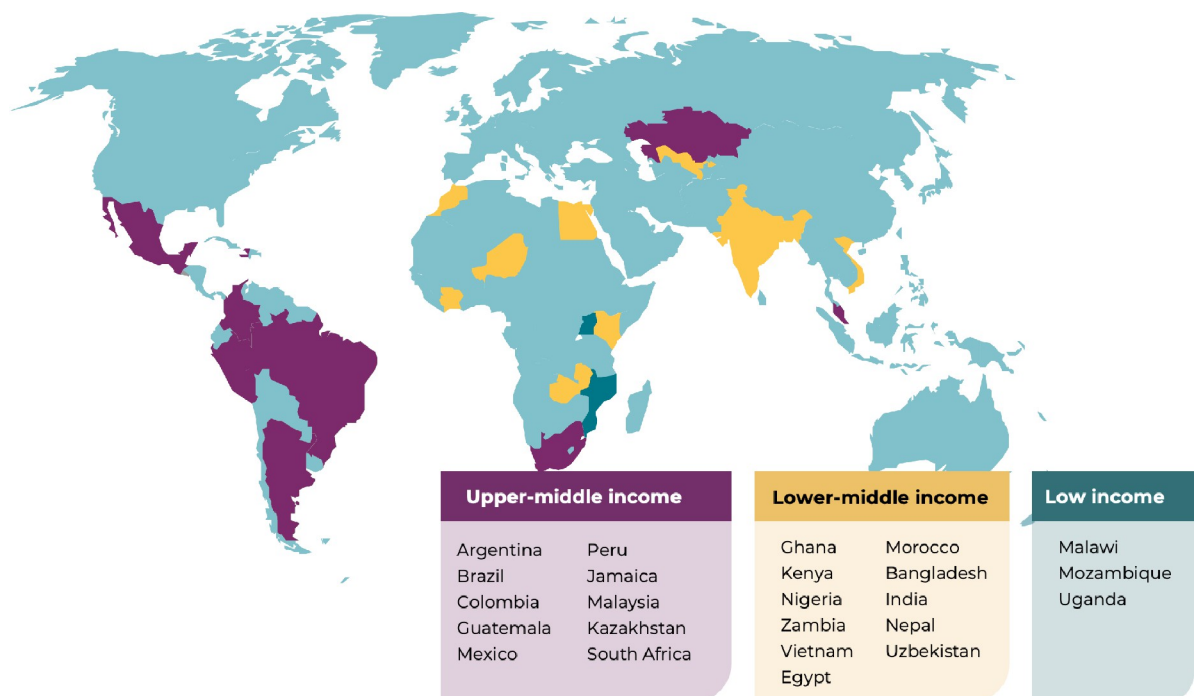

Fig 1. Participating countries by income-level World Bank status June 2021.

<https://doi.org/10.1371/journal.pone.0298154.g001>

responsible for the implementation of the protocol, choosing optimal methods of sample selection and data collection for their setting. The CLC is responsible for building their network of participating sites, each with a local site lead (LSL). Depending on the health infrastructure and resources available, countries may have between one and 12 sites, ideally representing the typical range of care women might receive within the country. This is summarised in Fig 2.

As part of the study, each CLC also participates in a qualitative study using semi-structured interviews to explore the care of women with ovarian cancer in their country and the opportunities for progress. They also provide additional information about care in their country collected in survey format (S3 and S4 Files). These elements will be analysed separately and used to help provide context for the global analysis of the Every Woman Study™ LMIC Edition, and content for the country reports.

Each LSL is responsible for identifying research assistants for the study (nurse, researcher, doctor, social worker or similar with experience in speaking with patients with ovarian cancer), to administer the questionnaire and enter data onto the REDCap electronic data capture tools hosted at the International Gynecologic Cancer Society [30, 31]. REDCap (Research Electronic Data Capture) is a secure, web-based software platform designed to support data capture for research studies, providing 1) an intuitive interface for validated data capture; 2) audit trails for tracking data manipulation and export procedures; 3) automated export procedures for seamless data downloads to common statistical packages; and 4) procedures for data integration and interoperability with external sources.

The research assistants are known as an administrator of the study. To keep consistency in terms of data collection, the administrators are kept to a minimum number per site, ideally one or two. It is important for local teams to consider which person or role will be able to communicate most effectively with the women, bearing in mind their situation and who they

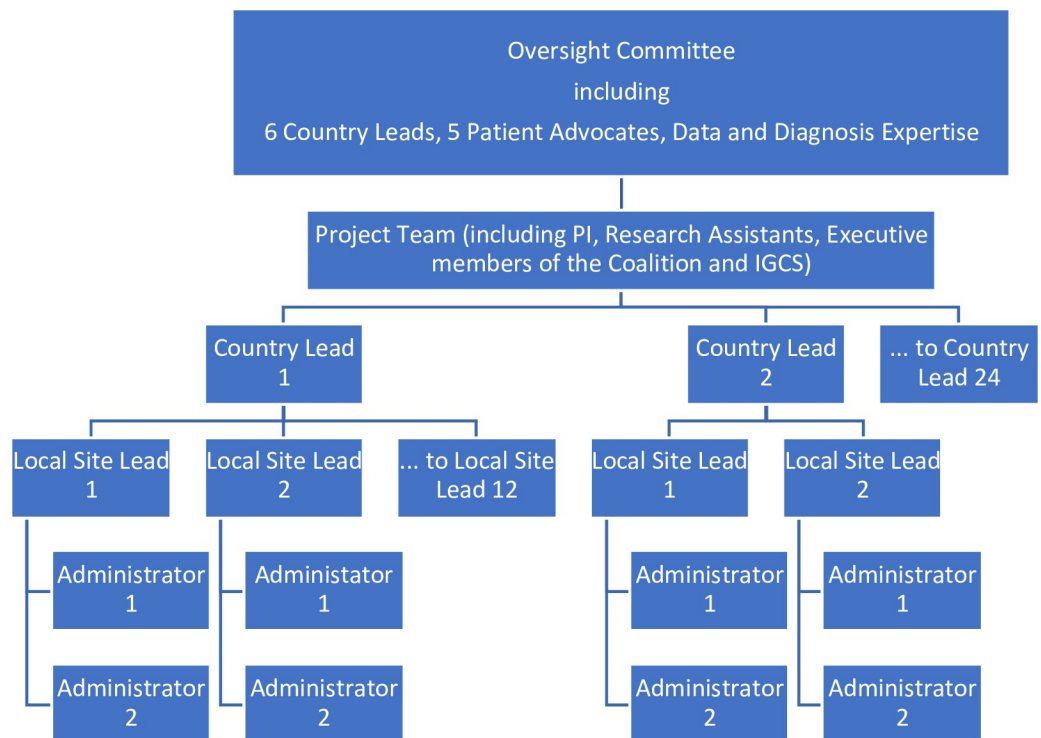

**Fig 2. Governance structure of the study.**

<https://doi.org/10.1371/journal.pone.0298154.g002>

would feel most comfortable talking to. This can vary between countries and was highlighted during the testing phase. Each CLC, LSL and administrator is provided with access to RED-Cap. Training on the system is provided by the Project Management team (live sessions, video recordings and/or PowerPoint guides).

### Sample selection

Initially the OC recommended a standardised single approach to sample selection, with all patients diagnosed within the last five years at a participating site being approached for inclusion in the study. This would have allowed for inclusion of survivors with a wide-spread time since diagnosis, and reached patients who might otherwise have stopped treatment or be in remission. However, given the diversity of resources, attendance patterns, and access to patient records between countries and even participating centres within a country, the OC decided a single approach was not feasible. A randomised approach was also not deemed suitable given the challenges ensuring consistency in implementation across many sites. Instead, a convenience sampling approach was approved, offering three different models listed below. To compensate for the variety of approaches, the method of sample selection will be recorded for each patient to allow for data stratification if required. CLCs suggest all participating centres in their country follow the same approach, but this is not mandated. The sample selection approaches, and associated caveats are as follows:

1. The site team reviews all cases on their records that have been seen in the previous five years, with a view to contacting eligible ovarian cancer patients and inviting them to participate. This approach is dependent on availability of staff resource, accessible patient records and reliable communication methods with patients. It might also catch patients who have previously stopped treatment but may also require them to attend a new appointment if they cannot be reached by email, or WhatsApp, and so completion rates may be lower;
2. The site team reviews all cases of ovarian cancer patients who have recently attended an appointment, working backwards in a sequential manner, until they meet the minimum or preferred sample size. This requires extra resource and good record-keeping, and may mean the sample selected is skewed to those with a more recent diagnosis; and
3. The site team reviews all cases of ovarian cancer patients due to attend a forthcoming appointment in person or virtually, inviting eligible patients to participate at that appointment. This approach requires less staff resources, as patient notes and attendance in clinic is already factored in. It may also improve completion rates. However, this approach may result in the inclusion of a greater proportion of patients with a more recent diagnosis, those on active treatment or experiencing complications, and can add time to clinic appointments.

### Sample size

The minimum sample size for each country is based on GLOBOCAN estimates of five-year disease prevalence in the country, producing results at the 95% confidence level (+/- 10%) [2]. CLCs can choose to recruit more patients to improve confidence intervals in their standalone results. In total, the study aims to collect data from at least 1534 women, which would provide results at a 95% confidence level, +/- 2.5%, based on global five-year prevalence. Should each of the 24 countries (3 low, 11 lower-middle and 10 upper-middle income countries) collect their minimum data, the sample size would be 2,160 (Table 2).



Table 2. Expected sample sizes by country and income level.

| REGIONAL AREA                     | COUNTRY      | WORLD BANK INCOME STATUS (JUNE 2021) [29] | MINIMUM SAMPLE SIZE | PREFERRED SAMPLE SIZE | FIVE-YEAR PREVALENCE OF OVARIAN CANCER |
|-----------------------------------|--------------|-------------------------------------------|---------------------|-----------------------|----------------------------------------|
| Sub-Saharan Africa                | Ghana        | Lower-middle                              | 92                  | 327                   | 2190                                   |
|                                   | Kenya        | Lower-middle                              | 92                  | 330                   | 2314                                   |
|                                   | Malawi       | Low                                       | 79                  | 203                   | 431                                    |
|                                   | Mozambique   | Low                                       | 70                  | 155                   | 259                                    |
|                                   | Nigeria      | Lower-middle                              | 95                  | 361                   | 6079                                   |
|                                   | South Africa | Lower-middle                              | 94                  | 347                   | 3559                                   |
|                                   | Uganda       | Low                                       | 89                  | 297                   | 1242                                   |
|                                   | Zambia       | Lower-middle                              | 78                  | 197                   | 403                                    |
| North Africa                      | Egypt        | Lower-middle                              | 95                  | 364                   | 6854                                   |
|                                   | Morocco      | Lower-middle                              | 93                  | 340                   | 395                                    |
| South-East Asia                   | Malaysia     | Upper-middle                              | 94                  | 357                   | 4989                                   |
|                                   | Vietnam      | Lower-middle                              | 95                  | 346                   | 3468                                   |
| Western Asia                      | Kazakhstan   | Lower-middle                              | 93                  | 343                   | 3207                                   |
|                                   | Uzbekistan   | Lower-middle                              | 92                  | 322                   | 1997                                   |
| Caribbean, Central, South America | Argentina    | Upper-middle                              | 95                  | 362                   | 6192                                   |
|                                   | Brazil       | Upper-middle                              | 96                  | 377                   | 18912                                  |
|                                   | Colombia     | Upper-middle                              | 95                  | 362                   | 6344                                   |
|                                   | Guatemala    | Upper-middle                              | 83                  | 236                   | 604                                    |
|                                   | Jamaica      | Upper-middle                              | 72                  | 165                   | 290                                    |
|                                   | Mexico       | Upper-middle                              | 95                  | 374                   | 13529                                  |
|                                   | Peru         | Upper-middle                              | 93                  | 345                   | 3398                                   |
| South-central Asia                | Bangladesh   | Lower-middle                              | 95                  | 364                   | 7044                                   |
|                                   | India        | Lower-middle                              | 96                  | 383                   | 103716                                 |
|                                   | Nepal        | Lower-middle                              | 89                  | 297                   | 1297                                   |
| Total                             |              | Lower-middle                              | 2160                | 6815                  | 198,713                                |

<https://doi.org/10.1371/journal.pone.0298154.t002>

### Inclusion and exclusion criteria

The inclusion criteria for the study are as follows:

1. The woman with ovarian cancer is a patient at one of the participating hospitals;
2. The woman with ovarian cancer is willing and able to give informed consent for participation in the study;
3. The woman is biologically female, aged between 18 and 99 years at the time of recruitment;
4. The woman has been diagnosed with any stage or type (including borderline) of primary ovarian, fallopian tube or primary peritoneal cancer within the previous five years (of the date of completing the survey); and
5. The woman has already been informed of their diagnosis of ovarian cancer at a previous appointment and the administrator is confident the woman with ovarian cancer understands what they have been told. If there is any doubt, the administrator must check with the clinician caring for the patient.

The participant is excluded from the study if any of the following apply:

1. The woman is attending the hospital or clinic to receive their diagnosis of ovarian cancer;

2. The woman is deemed too unwell to be able to cope with the demands of filling in the survey or responding to questions;
3. The woman is identified as being unable to cope with the demands of filling in the survey or responding to questions, or does not understand her diagnosis as a result of learning difficulties, medical conditions or mental health concerns; and
4. The woman has already completed the survey at a previous visit to the hospital.

### Data collection procedure

The administrator generates a unique identifier number (UIN) for the ovarian cancer patients on REDCap and some basic demographic and clinical data is entered to determine eligibility (S6 File). This information includes age at diagnosis, month and year of diagnosis, type and stage of ovarian cancer and current treatment status. This provides an overview of women attending the clinics and allows basic comparisons between the groups who do and don't consent.

Women with ovarian cancer are then approached and taken through an informed consent process. They are given written and verbal information about the study. If they are not attending clinics directly, they can be sent this information by email or be spoken to by phone. They are taken through the purpose and outline of the study and the risks and benefits of taking part are discussed. They are informed that they do not have to participate, they do not have to answer every question, and that they can withdraw their information up to 3 months after the close of data collection. They are then asked whether or not they consent to participate in the study and if they consent, whether they wish to i) self-complete a paper survey, ii) self-complete the survey via a secure email link, iii) self-complete the survey via a secure WhatsApp link (or other online messaging app), or iv) whether they wish to have the administrator ask them the questions. Their decision is recorded. Women who receive the information in person, or by phone need to record their consent in writing, and a copy is kept in a secure location on site. In addition to the standard consent form for the study, some local sites require patients to also complete their own informed consent forms, as part of the ethics approval. One country asked for women to consent with a thumbprint. Women who receive the information by email or WhatsApp can consent electronically at the start of the survey, or they can request an administrator contact them if they have questions before deciding.

Local teams are encouraged to supply the women with some written as well as verbal information about ovarian cancer, including at least two sources of potential support and information, be they non-governmental organisations (NGO), charities, or other groups (S6 File). The process is summarised in Fig 3.

### Data management

A paper log is created at each site, recording women with ovarian cancer considered for the study. It lists their name, UIN, eligibility, consent status and whether they went on to complete the survey. This is the only document that has identifiable information about participants, and the protocol requires it be kept in a locked cabinet by the LSL at the local site along with any paper copies of consent and survey answers. These records will be destroyed by the LSL six months after data collection closes. REDCap does not collect the patient's name, nor does the paper copy of the survey have the patient's name recorded on it.

Where surveys are completed on paper, or by interview, the administrator is responsible for entering relevant data onto REDCap using a protected login and password. This contains only non-identifiable information and is stored on the Amazon Cloud. All CLCs, LSLs and administrators involved must adhere to local or national guidelines on data privacy, as well as those included

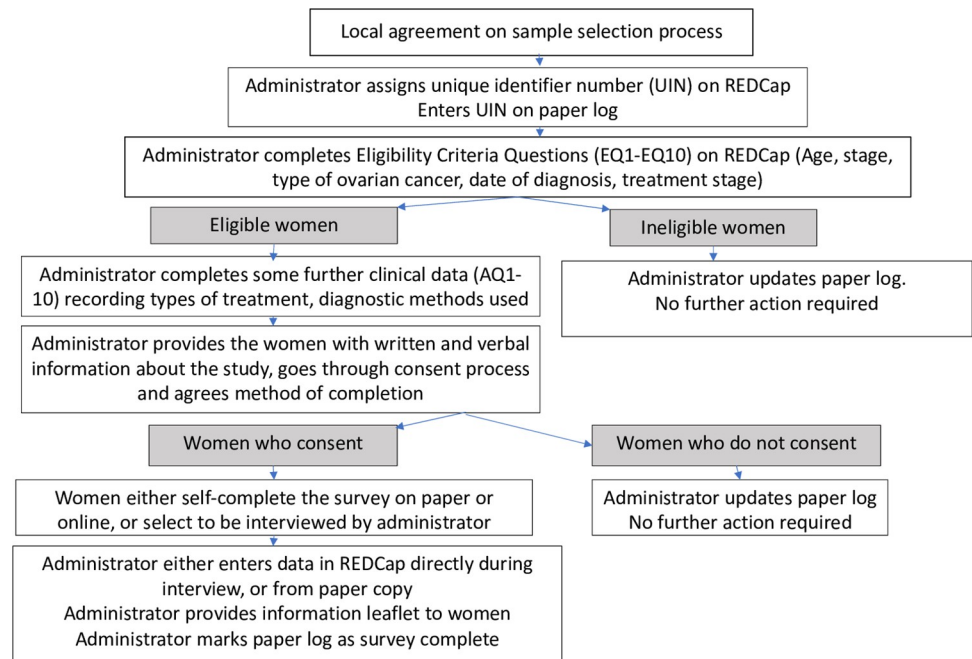

**Fig 3. Flowchart outlining the recruitment and data collection process.**

<https://doi.org/10.1371/journal.pone.0298154.g003>

in the protocol. LSLs and administrators will only see their local site data, while the CLC can view all relevant data in their country, with the ability to download and export their non-identifiable data and see basic summary charts and statistics. The global data set is stored on REDCap system, with a protected login and password, seen only by the Principal Investigator and study team. Within REDCap, the Principal Investigator can view data at site, country and global levels. When data is downloaded for any review or analysis, the files are password protected.

The dataset for each country will be cleaned, and the data reviewed for any potential local bias or problems by the Principal Investigator and CLC. A descriptive summary report will then be produced for each country. The final dataset will then be exported from REDCap and analysed using conventional statistical software, such as Stata or R.

### Safety considerations

This is a low-risk observational study, however, there remains a small but significant risk that participants will become uncomfortable when being questioned about their ovarian cancer experiences. Study teams are alerted to this and advised to have contact details of appropriate resources for the women. This may include referral for counselling, to a social worker, psychologist or to an NGO for support. The women will not be asked to complete the survey on the day they are given their diagnosis. Training is provided for the administrators, on administering the questionnaire, and on respectful conduct with the women.

### Data analysis

In our analysis, we seek to examine variation in key metrics (such as stage of ovarian cancer, time to diagnosis and levels of awareness) by country, region and by the socio-economic country group. In addition, we will explore associations between patient and country characteristics and key outcome measures. [Table 3](#) gives some examples of the outcome variables and expected areas for further analysis.

**Table 3. Outcome variables and expected further analysis.**

| Outcome variables                                                                                                                                                                                                                                                                                                                                                                                                                                      |                                                                                                                                                                                                                                            |                                                                                 |
|--------------------------------------------------------------------------------------------------------------------------------------------------------------------------------------------------------------------------------------------------------------------------------------------------------------------------------------------------------------------------------------------------------------------------------------------------------|--------------------------------------------------------------------------------------------------------------------------------------------------------------------------------------------------------------------------------------------|---------------------------------------------------------------------------------|
| <ul style="list-style-type: none"> <li>• Access to chemotherapy</li> <li>• Access to optimal cytoreductive surgery</li> <li>• Access to genetic testing</li> <li>• Level of ovarian cancer knowledge</li> <li>• Time to seek help</li> <li>• Time from seeking help to obtaining a diagnosis</li> <li>• Time from diagnosis to treatment</li> <li>• Information needs</li> <li>• Impact on family finances</li> <li>• Priorities for action</li> </ul> |                                                                                                                                                                                                                                            |                                                                                 |
| Further analysis                                                                                                                                                                                                                                                                                                                                                                                                                                       |                                                                                                                                                                                                                                            |                                                                                 |
| Outcome variables                                                                                                                                                                                                                                                                                                                                                                                                                                      | Predictor variables                                                                                                                                                                                                                        | Possible confounders                                                            |
| Access to chemotherapy                                                                                                                                                                                                                                                                                                                                                                                                                                 | Age on diagnosis<br>Family income<br>Distance to hospital<br>Who pays for ovarian cancer care<br>Resource level of participating site                                                                                                      | Stage of ovarian cancer<br>Date of diagnosis<br>Use of neoadjuvant chemotherapy |
| Access to optimal cytoreductive ovarian cancer                                                                                                                                                                                                                                                                                                                                                                                                         | Age on diagnosis<br>Family income<br>Distance to hospital<br>Who pays for ovarian cancer care<br>Resource level of participating site                                                                                                      | Date of diagnosis<br>Use of neoadjuvant chemotherapy                            |
| Levels of awareness of ovarian cancer                                                                                                                                                                                                                                                                                                                                                                                                                  | Education level<br>Family income level<br>Distance to hospital<br>Family history                                                                                                                                                           |                                                                                 |
| Time to seek help for symptoms                                                                                                                                                                                                                                                                                                                                                                                                                         | Age<br>Education level<br>Family income level<br>Who pays for ovarian cancer care<br>First person consulted re symptoms<br>Number of visits prior to diagnosis<br>Level of concern over symptoms<br>Type of symptoms<br>Number of symptoms |                                                                                 |

<https://doi.org/10.1371/journal.pone.0298154.t003>

We will perform descriptive and inferential statistics, overall and by country and economic grouping using statistical softwares such as STATA and R. Categorical variables will be summarised with counts and percentages, with Chi Squared Tests or Fisher's Exact Test used to compare proportions between groups. Continuous variables, such as time to diagnosis, will be examined graphically and summarised using appropriate metrics (mean and standard deviation or median and interquartile range depending on the distribution of the variable data). Tests, such as Kruskal-Wallis, will be applied to continuous variables. Outlying countries will be identified and described.

Appropriate regression analysis approaches will be used to examine associations between independent and outcome variables. Binary, ordinal or nominal regression will be used depending on the nature of the outcome variable. Univariable regression will be employed to examine individual associations and multivariable regression to examine combined associations between predictor and outcome variables.

The two free-text answers will be translated, coded and analysed using qualitative content analysis to identify categories and possible themes.

Each country will receive a bespoke report summarising their results, how these compare with the average for all participants at a global and/or regional level, and provide information about the context of ovarian cancer care in their country obtained through interviews and surveys with the CLCs. CLCs will 'own' the country specific data and will be encouraged to share their national findings, and utilise them for healthcare planning, further research and engagement activities in their country.

### **Ethical considerations and declarations**

The study is being conducted in accordance with the principles of the Declaration of Helsinki (2013). The protocol, survey, informed consent form, and participant information sheet have been submitted to an appropriate research ethics committee, health research authority as required in each country/site, and host institution(s) for written approval. Where necessary the CLC has submitted and obtained approval from the above parties and the Principal Investigator for all substantial amendments to the original approved documents. In three of the 24 countries, local ethics committees have made a requirement that patients be compensated for their time. This compensation level varies between US\$3 and US\$8 by country and is to be given on completion of the survey, with each patient receiving the same amount within a given country.

### **Status and timeline of the study**

At the time of writing, 24 countries are progressing with the study, with 19 actively collecting data on the REDCap platform. Some countries will stop collecting data in September 2023, but others, for whom translations, ethics approvals or local circumstances meant delayed starts or slow progress, data collection will continue up until the end of December 2023.

### **Discussion**

There are a number of strengths to the study. Participating countries will have the opportunity to compare key challenges and opportunities to improve survival and quality of life for women with ovarian cancer with other LMICs. For some of the teams, this is the first time they have contributed to research at their centre or been involved in collaborations with others in their country or internationally. For several countries, it provides the first dataset on ovarian cancer in their country, which could be used to inform clinical and policy decisions, drive academic research and develop interventions to improve outcomes for women with ovarian cancer. In addition, for women with ovarian cancer in many of the participating countries, this is the first time their experiences and opinions have been sought for research, bringing visibility to their plight and providing the opportunity to help other women in the same situation. Already there has been the formation of Ovarian Cancer Malaysia involving a patient member of the OC and the CLC, and a survivorship group is being planned in Kenya. The study also provides clinical staff with insights about important patient perspectives beyond treatment.

There are several limitations to the study. First, it will only capture experiences from women who have been able to afford or access a diagnosis and subsequent treatment. In some participating countries, there is just one centre that diagnoses and treats the condition so there are many economic, geographic, societal and cultural barriers preventing symptomatic women from getting medical help. Second, the varied approach of sample selection may naturally introduce biases, but it is not feasible to apply a uniform approach in all participating sites. To account for this, sensitivity analyses will be conducted by including and excluding certain selection methods where distinct patterns are observed. Third, the minimum sample size per country will only provide a broad overview with wide confidence intervals at a

standalone country level. However, the regional and global analysis will be able to determine how a country differs from the others in the study with greater accuracy, helping focus priorities for action. Finally, by running the study through known contacts of the Coalition and IGCS, there may be biases in terms of women's experiences, particularly around levels of care, as the CLC and LSL have access to training and networks of specialist clinicians.

The results of the study with analyses at global, regional, and thematic levels, will be disseminated through peer reviewed papers, with presentations at key relevant conferences. In this way it will contribute to the knowledge base on ovarian cancer globally, and in participating LMICs. It will be supported by a media outreach campaign. Each of the CLCs will be encouraged to submit papers for publication and presentations at national and regional level in local languages to extend the reach of the study and its findings. Subject to funding, the Coalition plans to work directly with some of the country teams to develop action plans and engagement with health policy makers, which will be informed by the study findings. Some of the participating countries plan to continue data collection, subject to the appropriate permissions, and/or adapt the study for other disease areas. By publishing the protocol, survey, and findings, the authors also hope to encourage other countries to consider running the study themselves.

## Supporting information

**S1 Checklist. Inclusivity in global research.**  
(DOCX)

**S1 File. Every woman study survey.**  
(PDF)

**S2 File. Kenya protocol.**  
(PDF)

**S3 File. Country lead interview questions.**  
(PDF)

**S4 File. Country lead survey.**  
(PDF)

**S5 File. Additional information for women.**  
(PDF)

**S6 File. Eligibility criteria and clinical data instrument.**  
(PDF)

## Acknowledgments

Our thanks go to the numerous women with ovarian cancer who have helped develop this study. In particular we mention Dicey Scroggins (deceased), an ovarian cancer survivor who played a leading role in planning the scope of the study through her role as Director of Global Outreach and Engagement with IGCS, and Celina May (deceased) who was a patient advocate on the OC, and went on to found Ovarian Cancer Malaysia.

Each of the CLCs who did not meet authorship criteria also merit acknowledgement, as their feedback, testing and commitment has been invaluable in highlighting issues and ways of making the study workable in their settings. They are Thomas Konney (Ghana), Ricardina Rangeiro and Dercia Changulez (Mozambique), and Susan Msadabwe (Zambia). We also acknowledge the contribution of Dr Sara Nasser from the OC.

Direct costs associated with the study have been met by the World Ovarian Cancer Coalition and the International Gynecologic Cancer Society.

## Author Contributions

**Conceptualization:** Frances Reid, Tracey Adams, Rafe Sadnan Adel, Carlos E. Andrade, Ian G. Bambury, Raikhan Bolatbekova, David Cantu-De Leon, Phaedra Charlton, Carlos Chávez Chirinos, Robin Cohen, Dilyara Kaidarova, Iren Lau, Clara MacKay, Asima Mukhopadhyay, Martin Origa, Jitendra Pariyar, Ngoc T. H. Phan, Basel Refky, Afrin F. Shaffi, Eva-Maria Strömsholm, Runcie C. W. Chidebe, Garth Funston, Isabelle Soerjomataram.

**Investigation:** Frances Reid, Tracey Adams, Anmol Bajwa, Ian G. Bambury, Nada Benhima, Raikhan Bolatbekova, David Cantu-De Leon, Carlos Chávez Chirinos, Erick Estuardo Estrada, Dilyara Kaidarova, Precious Takondwa Makondi, Asima Mukhopadhyay, Aisha Mustapha, Florencia Noll, Martin Origa, Jitendra Pariyar, Shahana Pervin, Ngoc T. H. Phan, Basel Refky, Afrin F. Shaffi, Yin Ling Woo, Sook-Yee Yoon, Nargiza Zakirova.

**Methodology:** Frances Reid, Tracey Adams, Robin Cohen, Garth Funston, Isabelle Soerjomataram.

**Project administration:** Frances Reid, Clara MacKay.

**Supervision:** Tracey Adams, Robin Cohen, Mary Eiken, Clara MacKay.

**Writing – original draft:** Frances Reid.

**Writing – review & editing:** Frances Reid, Tracey Adams, Rafe Sadnan Adel, Carlos E. Andrade, Anmol Bajwa, Ian G. Bambury, Nada Benhima, Raikhan Bolatbekova, David Cantu-De Leon, Phaedra Charlton, Carlos Chávez Chirinos, Robin Cohen, Erick Estuardo Estrada, Dilyara Kaidarova, Iren Lau, Precious Takondwa Makondi, Asima Mukhopadhyay, Aisha Mustapha, Florencia Noll, Martin Origa, Jitendra Pariyar, Shahana Pervin, Ngoc T. H. Phan, Basel Refky, Afrin F. Shaffi, Eva-Maria Strömsholm, Yin Ling Woo, Sook-Yee Yoon, Nargiza Zakirova, Runcie C. W. Chidebe, Garth Funston, Isabelle Soerjomataram.

## References

1. Sung H, Ferlay J, Siegel RL, Laversanne M, Soerjomataram I, Jemal A, et al. Global cancer statistics 2020: GLOBOCAN estimates of incidence and mortality worldwide for 36 cancers in 185 countries. *CA Cancer J Clin.* 2021; 71: 209–249. <https://doi.org/10.3322/caac.21660> PMID: 33538338
2. International Agency for Research on Cancer, Global Cancer Observatory, Cancer Today, Search by population and cancer type [internet] Lyon. Available from <https://gco.iarc.fr/today> Accessed August 8th 2022
3. International Agency for Research on Cancer, Global Cancer Observatory, Cancer Tomorrow, Search by population and cancer type [internet] Lyon. Available from <https://gco.iarc.fr/tomorrow> Accessed 30th August 2023
4. International Agency for Research on Cancer, Global Cancer Observatory, Cancer Tomorrow, About: Data sources and methods [internet] Lyon. Available from <https://gco.iarc.fr/tomorrow/en/about> Accessed 30th August 2023
5. Cabasag CJ et al. “Ovarian cancer today and tomorrow: A global assessment by world region and Human Development Index using GLOBOCAN 2020.” *International journal of cancer*, 10.1002/ijc.34002. 23 Mar. 2022, <https://doi.org/10.1002/ijc.34002> PMID: 35322413
6. Razi S, Ghoncheh M, Mohammadian-Hafshejani A, Aziznejhad H, Mohammadian M, & Salehiniya H. The incidence and mortality of ovarian cancer and their relationship with the Human Development Index in Asia. *Ecancermedicalscience.* 2016; 10, 628.

7. Yang H, Pu H, Wang S, Ni R, Li B. Inequality of female health and its relation with urbanization level in China: geographic variation perspective. *Environ Sci Pollut Res Int.* 2019; 26(16):16662–16673. <https://doi.org/10.1007/s11356-019-04555-x> PMID: 30989606
8. Teng Z, Han R, Huang X, Zhou J, Yang J, Luo P et al. Increase of Incidence and Mortality of Ovarian Cancer during 2003–2012 in Jiangsu Province, China. *Front. Public Health.* 2016; 4:146. <https://doi.org/10.3389/fpubh.2016.00146> PMID: 27458579
9. Allemani C, Bouzbid S et al. Global surveillance of trends in cancer survival 2000–14 (CONCORD-3): analysis of individual records for 37 513 025 patients diagnosed with one of 18 cancers from 322 population-based registries in 71 countries, *The Lancet*, Volume 391, Issue 10125, 1023–1075
10. Torre LA, Trabert B, DeSantis CE, Miller KD, Samimi G, Runowicz CD, et al. Ovarian cancer statistics, 2018. *CA Cancer J Clin.* 2018 Jul; 68(4):284–296. <https://doi.org/10.3322/caac.21456> Epub 2018 May 29. PMID: 29809280; PMCID: PMC6621554.
11. Menon U et al. “Ovarian cancer population screening and mortality after long-term follow-up in the UK Collaborative Trial of Ovarian Cancer Screening (UKCTOCS): a randomised controlled trial.” *Lancet (London, England)* vol. 397, 10290 (2021); 2182–2193. [https://doi.org/10.1016/S0140-6736\(21\)00731-5](https://doi.org/10.1016/S0140-6736(21)00731-5) PMID: 33991479
12. Reid F, Bhatla N, Oza AM, et al The World Ovarian Cancer Coalition Every Woman Study: identifying challenges and opportunities to improve survival and quality of life *International Journal of Gynecologic Cancer* 2021; 31:238–244. <https://doi.org/10.1136/ijgc-2019-000983> PMID: 32540894
13. Bray F, Colombet M, Mery L, Piñeros M, Znaor A, Zanetti R et al, editors (2017) *Cancer Incidence in Five Continents, Vol. XI* (electronic version). Lyon: International Agency for Research on Cancer. Available from: <https://ci5.iarc.fr>, accessed 16<sup>th</sup> August 2023
14. Brisson M, Kim JJ, et al: Impact of HPV vaccination and cervical screening on cervical cancer elimination: a comparative modelling analysis in 78 low-income and lower-middle-income countries, *The Lancet*, Volume 395, Issue 10224, 2020, Pages 575–590, ISSN 0140-6736 [https://doi.org/10.1016/S0140-6736\(20\)30068-4](https://doi.org/10.1016/S0140-6736(20)30068-4) PMID: 32007141
15. Birnbaum JK, Duggan C, Anderson BO, Etzioni R: Early detection and treatment strategies for breast cancer in low-income and upper middle-income countries: a modelling study, *Lancet Glob Health* 2018; 6: e885–93 [https://doi.org/10.1016/S2214-109X\(18\)30257-2](https://doi.org/10.1016/S2214-109X(18)30257-2) PMID: 30012269
16. Goff BA, Mandel LS, Melancon CH, Muntz HG. Frequency of Symptoms of Ovarian Cancer in Women Presenting to Primary Care Clinics. *JAMA.* 2004; 291(22):2705–2712. <https://doi.org/10.1001/jama.291.22.2705> PMID: 15187051
17. Goff BA et al. “Development of an ovarian cancer symptom index: possibilities for earlier detection.” *Cancer* vol. 109,2 (2007): 221–7. <https://doi.org/10.1002/cncr.22371> PMID: 17154394
18. Funston G, et al. “Detecting ovarian cancer in primary care: can we do better?” *The British journal of general practice: the journal of the Royal College of General Practitioners* vol. 72,720 312–313. 30 Jun. 2022. <https://doi.org/10.3399/bjgp22X719825> PMID: 35772996
19. Cabasag CJ. et al: Exploring variations in ovarian cancer survival by age and stage (ICBP SurvMark-2): A population-based study *Gynecologic Oncology*, Volume 157, Issue 1, April 2020 <https://doi.org/10.1016/j.ygyno.2019.12.047>
20. Butler J, Foot C, Bomb M, et al. The International Cancer Benchmarking Partnership: An international collaboration to inform cancer policy in Australia, Canada, Denmark, Norway, Sweden and the United Kingdom, *Health Policy*, Volume 112, Issue 1, 2013, Pages 148–155, ISSN 0168-8510, <http://dx.doi.org/10.1016/j.healthpol.2013.03.021>.
21. Arnold M, Rutherford MJ, Bardot A, et al. Progress in cancer survival, mortality, and incidence in seven high-income countries 1995–2014 (ICBP SURVMARK-2): a population-based study. *Lancet Oncol.* 2019; 20(11):1493–1505. [https://doi.org/10.1016/S1470-2045\(19\)30456-5](https://doi.org/10.1016/S1470-2045(19)30456-5) PMID: 31521509
22. Rose PW, Rubin G, Perera-Salazar R, et al, Explaining variation in cancer survival between 11 jurisdictions in the International Cancer Benchmarking Partnership: a primary care vignette survey, *BMJ Open* 2015; 5:e007212. <https://doi.org/10.1136/bmjopen-2014-007212> PMID: 26017370
23. Hao Jiatao, Liu Ying, Zhang Taohong, He Jinmei, Zhao Haoyi, An Ruifang, et al: Efficacy and safety of PARP inhibitors in the treatment of advanced ovarian cancer: An updated systematic review and meta-analysis of randomized controlled trials, *Critical Reviews in Oncology/Hematology*, Volume 157, 2021, 103145, ISSN 1040-8428, Available from <https://doi.org/10.1016/j.critrevonc.2020.103145> PMID: 33254040
24. Manchanda R, Sun L, Patel S, Evans O, Wilschut J, De Freitas Lopes AC, et al. Economic Evaluation of Population-Based *BRCA1/BRCA2* Mutation Testing across Multiple Countries and Health Systems. *Cancers.* 2020; 12(7):1929. <https://doi.org/10.3390/cancers12071929> PMID: 32708835
25. Ovarian Cancer Canada: Our Impact, The Every Woman Study™ Canadian Edition [internet], Toronto. Available from <https://ovariancanada.org/our-impact> Accessed 1<sup>st</sup> May 2023



26. Tone A, Boghosian T, et al. Understanding the Experience of Canadian Women Living with Ovarian Cancer through the Every Woman Study™. *Curr Oncol*. 2022 May 5; 29(5):3318–3340. <https://doi.org/10.3390/curroncol29050271> PMID: 35621661; PMCID: PMC9139742.
27. Target Ovarian Cancer, Pathfinder 2022: Faster, further and fairer [internet], London. Available from <https://targetovariancancer.org.uk/sites/default/files/2022-10/Target%20Ovarian%20Cancer%20Pathfinder2022.pdf> Accessed 1<sup>st</sup> May 2023
28. Ovarian Cancer Australia, National Action Plan (2020–2025) [internet], Melbourne Available from <https://www.ovariancancer.net.au/page/76/national-action-plan#:~:text=Women%20diagnosed%20with%20ovarian%20cancer,with%20ovarian%20cancer%20in%20Australia>. Accessed 1<sup>st</sup> May 2023
29. Serajuddin U and Hamadeh N, World Bank Blogs, New World Bank country classifications by income level: 2020–2021 [internet] published on Data Blog, Washington. Available from <https://blogs.worldbank.org/opendata/new-world-bank-country-classifications-income-level-2020-2021>
30. Harris PA, Taylor R, Thielke R, Payne J, Gonzalez N, Conde JG, Research electronic data capture (REDCap)— A metadata-driven methodology and workflow process for providing translational research informatics support, *J Biomed Inform*. 2009 Apr; 42(2):377–81. <https://doi.org/10.1016/j.jbi.2008.08.010> PMID: 18929686
31. Harris PA, Taylor R, Minor BL, Elliott V, Fernandez M, O'Neal L, et al, The REDCap consortium: Building an international community of software partners, *J Biomed Inform*. 2019 May 9 <https://doi.org/10.1016/j.jbi.2019.103208>.
